# Supplementary material
Source: MDPI journal article supplement (https://www.mdpi.com/2673-7078/1/1/7)
Supplement: s1 [file s1]

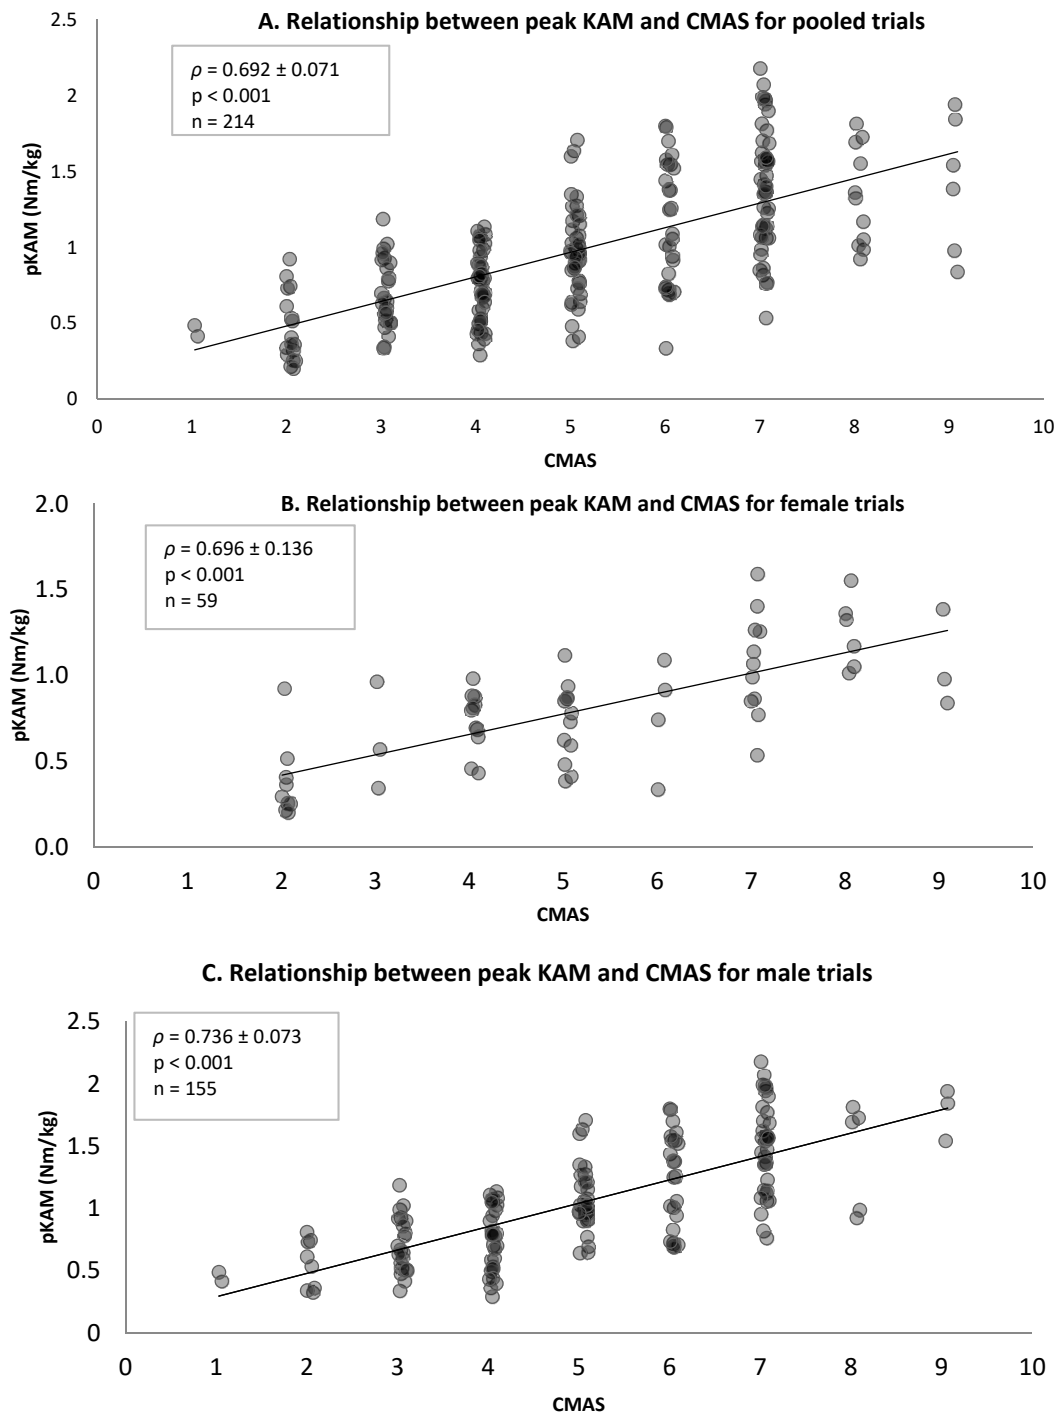

**Figure S1.** Relationship between CMAS and peak KAMs (pKAM) for pooled (A), female (B), and male (C) CMAS trials. Adapted from [141].
